# Supplementary material for: Underwater flight by the planktonic sea butterfly
Source: Oxford University Press journal article supplement (doi:10.1242/jeb.129205), 2016-02-15
Supplement: jeb129205supp.pdf [file jeb129205supp.pdf]

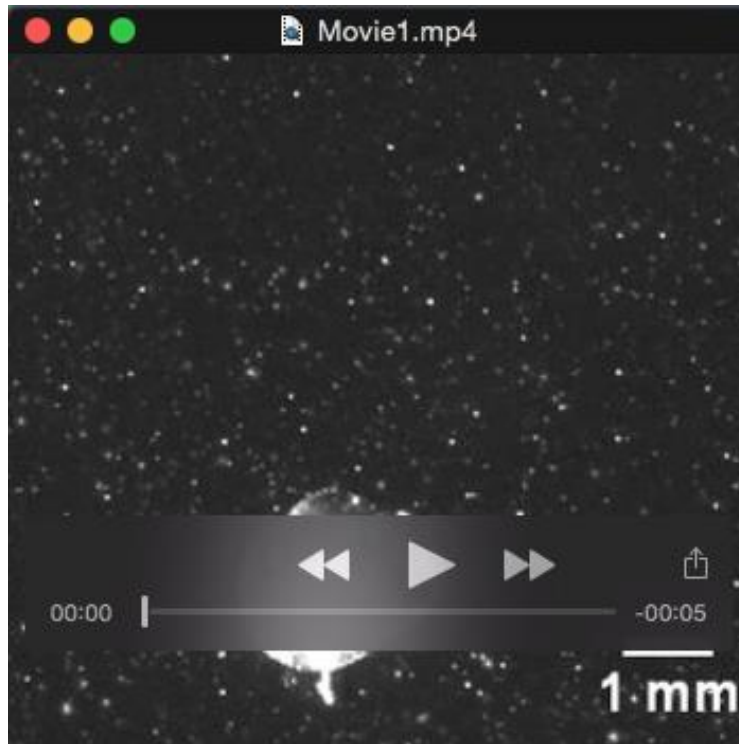

**Movie 1: High speed movie of pteropod 1.** This movie, recorded at 500 frames per second and played back at 25 frames per second, shows a lateral view of a pteropod swimming upward. Note its transparent parapodia. The pteropod is illuminated by lasers, and particles in the seawater show the induced fluid motion.

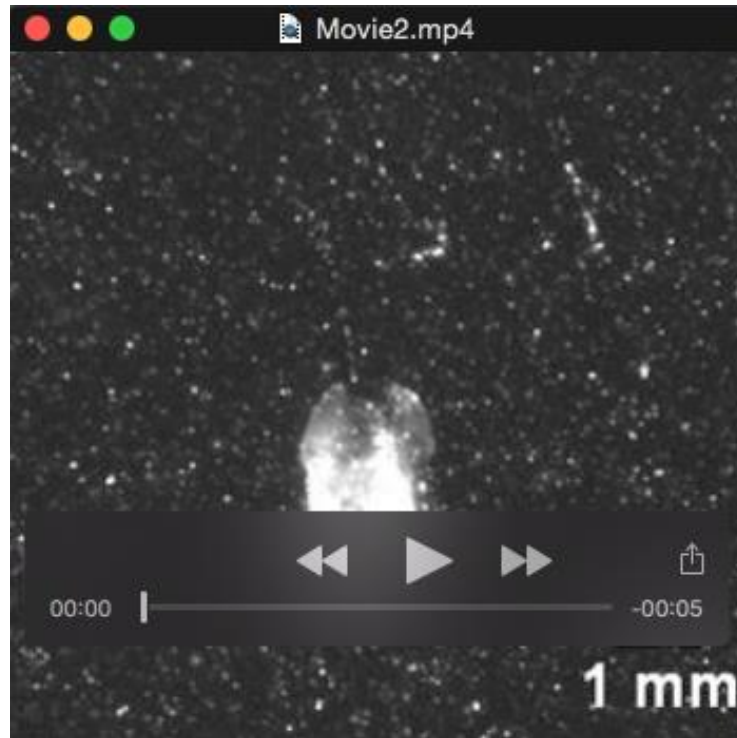

**Movie 2: High speed movie of pteropod 3.** This movie, recorded at 500 frames per second and played back at 25 frames per second, shows a dorsal view of an ascending pteropod. The fluid motion induced by the ‘near fling’ is particularly visible.
